# Supplementary material
Source: publisher site journal article supplement (https://www.dovepress.com/article/309364)
Supplement: Supplementary file 1 [file get_supplementary_file.php]

**Appendix 1: Self-Reported and Physiotherapist Collected Variables with Answers**

**Patient-reported variables and answers in GLA:D**®-**registry**

| **Variable** | **Baseline** | **3 Months Follow Up** | **12 Months Follow Up** | **Answers** |
| --- | --- | --- | --- | --- |
| **Age (years)** | X |  |  |  |
| **Gender** | X |  |  | Female  Male |
| **BMI** | X |  |  | kg/m² |
| **Education** | X |  |  | Primary school  Secondary school  Short-term education  Middle-term education  Long-term education |
| **Pain Intensity** | X |  |  | VAS (0-100 mm.) |
| **Pain Medication** | X |  |  | Yes  No |
| **Comorbidites** | X |  |  | High blood pressure  High cholesterol**  Heart disease  Ulcers or other stomach disease  Chronic lung disease  Diabetes*  Diabetes type 1  Diabetes type 2  Kidney or liver disease  Anemia or other blood disease  Cancer  Depression  Rheumatoid arthritis  Neurological disease  Other medical disease |
| **Baseline Replacement Surgery** | X |  |  | Knee Surgery  Hip Surgery |
| **Baseline to Follow up Replacement Surgery** |  |  | X | Knee Surgery  Hip Surgery |

**Category of Diabetes (Collected from the 1th of July 2014 until the 26th of August 2018) was divided into Diabetes 1 and Diabetes 2 after 26th of August 2018.*

*****High cholesterol was only collected from 24th of October 2018.*

**Physiotherapist-reported variables and answers in GLA:D**®-**registry**

| **Variables** | Baseline | 3 Months Follow Up | Answers |
| --- | --- | --- | --- |
| **X-Ray of most affected joint** | X |  | No  Yes, more than 6 months ago  Yes, within last 6 months  Do not know |
| **Hip Surgery** | X | X | Yes  No |
| **Knee Surgery** | X | X | Yes  No |
| **Which Surgery? (Right/Left Hip)** | X | X | Diagnostic arthroscopy  Arthroscopic surgery for femoroacetabular Impingement syndrome  Removal of loose bodies in hip joint  Surgical treatment of hip dysplasia  Tenotomy  Labral repair  Partial synovectomy  Ligament reconstruction  Microfracture  Arthroplasty  Hip resurfacing  Osteosynthesis of proximal femoral fracture  Other hip surgeries |
| **Which Surgery? (Right/Left Knee)** | X | X | Diagnostic arthroscopy  Arthroscopic meniscal surgery  Removal of loose bodies in knee joint  Anterior Cruciate Ligament reconstruction  Posterior Cruciate Ligament reconstruction  Collateral ligaments reconstruction  Debridement  Microfracture  Surgery for jumper's knee  Partial synovectomy  Patellae stabilization  Osteotomy  Arthroplasty  Patellae, other  Other knee surgeries |
| **Pain Medication** | X | X | Paracetamol/Acetaminophen  Non-steroidal anti-inflammatory drugs/NSAID (e.g. ibuprofen, aspirin)  Topical NSAID cream  Glucosamine  Hyaluronic acid injection into your joint  Corticosteroid (cortisone) injection into your joint  Morphine or other opioids  Tramadol  Codeine  Tricyclic antidepressants (for neuropathic pain)  Anticonvulsants (e.g. Gabapentin)  Methotrexate  Herbal supplements |

**Appendix 2. SKS-ICD Codes**

**Definitions**

| **Description** | **Definition** |
| --- | --- |
| **Medication** |  |
| Paracetamol/Acetaminophen | N02BE01 |
| NSAID (e.g. ibuprofen, aspirin) | M01A* excl. M01AX* |
| Topical NSAID cream | M02AA* |
| Glucosamine | M01AX05 |
| Hyaluronic acid injection | M01AX01 |
| Corticosteroid (cortisone) injection | H02AB* |
| Morphine or other opioids | N02A (excl. N02AA08 N02AJ06 N02AJ07 N02AJ08 N02AJ09 N02AX02) |
| Tramadol | N02AX02 |
| Codeine | N02AA08 N02AJ06 N02AJ07 N02AJ08 N02AJ09 |
| Tricyclic antidepressants (for neuropathic pain) | N06A |
| Anticonvulsants | N03A |
| Methotrexate | L04AX03 |
| Bisphosphonate | M05BA* M05BB* |
| **Surgery** |  |
| **Hip** |  |
| Diagnostic arthroscopy | KNFA11B |
| Arthroscopic surgery for femoroacetabular   impingement syndrome | KNFA01A, KNFA11, KNFA11B, KNFE91, KNFF01, KNFF11, KNFF21, KNFF31, KNFF91, KNFH31, KNFH41, KNFH51, KNFH91 |
| Removal of loose bodies in hip joint | KNFH41, KNFH42, KNFH4 |
| Surgical treatment of hip dysplasia | KNEK59 |
| Tenotomy | KNFL39, KNFL69 |
| Labral repair  Ligament reconstruction | KNFE91, KNFE92 |
| Synovectomy | KNFF0, KNFF1 |
| Cartilage Microfracture | KNFK29 |
| Arthroplasty | KNFB, KNFC, KNFG09, KNFG19, KNFG29 |
| Hip resurfacing | KNFK09, KNFK19, KNFK29, KNFK39, KNFK99 |
| Osteosynthesis of proximal femoral fracture | KNFJ30, KNFJ31, KNFJ32, KNFJ33, KNFJ40, KNFJ41, KNFJ42, KNFJ43, KNFJ50, KNFJ51, KNFJ52, KNFJ53, KNFJ60, KNFJ61, KNFJ62, KNFJ63, KNFJ70, KNFJ71, KNFJ72, KNFJ73, KNFJ80, KNFJ81, KNFJ82 |
| Other hip surgeries | KNFA22A, KNFA22C, KNFA02A, KNFA12, KNFF2, KNFF3, KNFF9, KNFG39, KNFG49, KNFG59, KNFH0, KNFH21, KNFH22, KNFH32, KNFH52, KNFH71, KNFH72 , KNFH92, KNFL04, KNFL09, KNFL19, KNFL29, KNFL49, KNFL59, KNFL79, KNFL89, KNFL99, KNFM79, KNFM99, KNFN09A, KNFN19A, KNFN29A, KNFN39A, KNFR, KNFS19, KNFS49, KNFS99, KNFT09, KNFT19, KNFT39, KNFT49, KNFT50, KNFT51, KNFT52, KNFT53, KNFT99, KNFU0, KNFU1, KNFU89A, KNFU99, KNFW |
| **Knee** |  |
| Diagnostic arthroscopy | KNGA11 |
| Arthroscopic meniscal surgery | KNGD01, KNGD11, KNGD21, KNGD91 |
| Removal of loose bodies in knee joint | KNGH41 |
| ACL reconstruction | KNGE11, KNGE15, KNGE21, KNGE25, KNGE31, KNGE35, KNGE41, KNGE45, KNGE51, KNGE55, KNGE91, KNGE95 |
| PCL reconstruction | KNGE12, KNGE16, KNGE22, KNGE26, KNGE32, KNGE36, KNGE42, KNGE46, KNGE52, KNGE56, KNGE92, KNGE96 |
| Collateral ligaments reconstruction | KNGE13, KNGE14, KNGE23, KNGE24, KNGE33, KNGE34, KNGE43, KNGE44, KNGE53, KNGE54, KNGE93, KNGE94 |
| Debridement | KNGF91, KNGF31, KNGF11 |
| Microfracture | KNGK29 |
| Surgery for jumper's knee | KNGL59, KNGK19 |
| Synovectomy | KNGF0, KNGF1 |
| Patellae stabilization | KNGG29A, KNGG29B |
| Osteotomy | KNGK59 |
| Arthroplasty | KNGB, KNGC |
| Patellae, other | KNGH7, KNGJ10, KNGJ30, KNGJ40, KNGJ60, KNGJ70, KNGJ80, KNGJ90 |
| Other knee surgeries | KNGF3, KNGA02A, KNGA12, KNGA20A, KNGA20C, KNGA22A, KNGA22C, KNGA32A, KNGD02, KNGD12, KNGD22, KNGD92, KNGE09, KNGE19, KNGE29, KNGE39, KNGE49, KNGE59, KNGE99, KNGG09, KNGG19, KNGG39, KNGG49, KNGG59,  KNGG99, KNGF2, KNGF9, KNGH01, KNGH02, KNGH11, KNGH12, KNGH21, KNGH22, KNGH31, KNGH32, KNGH42, KNGH5, KNGH91, KNGH92, KNGJ11, KNGJ19, KNGJ31, KNGJ39, KNGJ41, KNGJ49, KNGJ51, KNGJ59, KNGJ61, KNGJ69, KNGJ71, KNGJ79, KNGJ81, KNGJ89, KNGJ91, KNGJ99, KNGK09, KNGK19, KNGK29, KNGK39, KNGK49, KNGK79, KNGK89, KNGK99, KNGL, KNGM39, KNGM79, KNGM99, KNGP29A, KNGR, KNGS, KNGT, KNGU0, KNGU1, KNGU39, KNGU49, KNGU69, KNGU89A, KNGU99, KNGW |

| **Comorbidities** | **ICD10 codes** | **ATC codes** |
| --- | --- | --- |
| High blood pressure | I10,11,12,13,14,15 | C03A C07 C08 C09 |
| High cholesterol | E78.0 | C10 |
| Heart disease | I05-I09, I20-I28, I30-I52 |  |
| Ulcers or other stomach disease | K20-K31 | A02B |
| Chronic lung disease | J40-J47 -J60,61,62,63,64,65,66, J684, J701, J703 | R03 |
| Diabetes | E10, E11 E12, E13, E14 | A10A A10B |
| Diabetes type 1 | E10 |  |
| Diabetes type 2 | E11 | A10B |
| Kidney or liver disease | N00-N29, K70-K77 |  |
| Anemia or other blood disease | D50-D69, D78, |  |
| Cancer | C00-C96 |  |
| Depression | F313, F314, F315, F32, F33 | N06A |
| Rheumatoid arthritis | M05, M06 |  |
| Neurological disease | G00-G99, I60-69 |  |

**Appendix 3. Tabulations2x2**

| **Comorbidities** |  |  | **Self report** |  |  | **Surgery (right side)** |  |  |
| --- | --- | --- | --- | --- | --- | --- | --- | --- |
|  | Registry |  |  | Registry |  |  | Registry |  |
| GLAD | No | Yes | GLAD | No | Yes | GLAD | No | Yes |
| High blood pressure |  |  | Knee surgery (baseline) |  |  | 1 Diagnostic arthroscopy |  |  |
| No | 16631 | 3341 |  | 31903 | 86 |  | 13369 |  |
| Yes | 501 | 11412 |  | 69 | 1531 |  | 10 |  |
| High cholesterol |  |  | Hip surgery (baseline) |  |  | 2 Arthroscopic surgery for femoroacetabular impingement syndrome |  |  |
| No | 893 | 104 |  | 31588 | 91 |  | 13359 | 12 |
| Yes | 130 | 337 |  | 84 | 1826 |  | n<5 | n<5 |
| Heart disease |  |  | Knee surgery (baseline to flwup) |  |  | 3 Removal of loose bodies in hip joint |  |  |
| No | 27219 | 2100 |  | 15122 | 71 |  | 13376 |  |
| Yes | 785 | 1780 |  | 65 | 700 |  | n<5 |  |
| Ulcers or other stomach diseases |  |  | Hip surgery (baseline to flwup) |  |  | 4 Surgical treatment of hip dysplasia |  |  |
| No | 23605 | 6601 |  | 15146 | 52 |  | 13367 | 0 |
| Yes | 392 | 1286 |  | 36 | 724 |  | 11 | n<5 |
| Chronic lung disease |  |  | **X-ray of most affected joint** |  |  | 6 Tenotomy |  |  |
| No | 27755 | 2145 |  | 2380 | 816 |  | 13370 | 8 |
| Yes | 387 | 1599 |  | 4870 | 16853 |  | n<5 | 0 |
| Diabetes |  |  | Knee x-ray |  |  | 7 Labral repair or ligament reconstruction |  |  |
| No | 26476 | 169 |  | 10946 | 2816 |  | 13367 | n<5 |
| Yes | 195 | 1835 |  | 10184 | 14799 |  | 6 | n<5 |
| Diabetes type 1 |  |  | Hip x-ray |  |  | 8 Partial synovectomy |  |  |
| No | 3163 | 14 |  | 33936 | 1892 |  | 13367 | 11 |
| Yes | 21 | 16 |  | 989 | 1928 |  | n<5 | 0 |
| Diabetes type 2 |  |  | **Pain medication** |  |  | 10 Microfracture |  |  |
| No | 2942 | 21 |  | 15001 | 2789 |  | 13376 | n<5 |
| Yes | 155 | 96 |  | 10622 | 10333 |  | n<5 | 0 |
| Kidney or liver disease |  |  | Opioids |  |  | 11 Arthroplasty |  |  |
| No | 30700 | 752 |  | 22712 | 2596 |  | 12875 | 35 |
| Yes | 212 | 223 |  | 7152 | 6285 |  | 27 | 442 |
| Anemia or other blood disease |  |  | Paracetamol |  |  | 12 Hip resurfacing |  |  |
| No | 31063 | 439 |  | 36792 | 75 |  | 1945 |  |
| Yes | 316 | 66 |  | 1863 | 15 |  | n<5 |  |
| Cancer |  |  | NSAID |  |  | 13 Osteosynthesis of proximal femoral fracture |  |  |
| No | 29271 | 1735 |  | 37052 | 386 |  | 13329 | 19 |
| Yes | 241 | 637 |  | 891 | 416 |  | 14 | 17 |
| Depression |  |  | Topical NSAID |  |  | 14 Other hip surgeries |  |  |
| No | 28343 | 2135 |  | 35635 | 1896 |  | 13314 | 29 |
| Yes | 351 | 1055 |  | 340 | 874 |  | 34 | n<5 |
| Rheumatoid arthritis |  |  | Morphine or other opioids |  |  | 1 Diagnostic arthroscopy |  |  |
| No | 30146 | 126 |  | 37821 | 392 |  | 12523 | 223 |
| Yes | 1343 | 247 |  | 424 | 108 |  | 554 | 79 |
| Neurological disease |  |  | Tramadol |  |  | 2 Arthroscopic meniscal surgery |  |  |
| No | 26843 | 3340 |  | 33618 | 40 |  | 11992 | 313 |
| Yes | 999 | 699 |  | 5014 | 73 |  | 654 | 420 |
|  |  |  | Codeine |  |  | 3 Removal of loose bodies in knee joint |  |  |
|  |  |  |  | 38703 | 13 |  | 13188 | 16 |
|  |  |  |  | 24 | 5 |  | 165 | 10 |
|  |  |  | Glucosamine |  |  | 4 ACL reconstruction |  |  |
|  |  |  |  | 36863 | 1105 |  | 13271 | 9 |
|  |  |  |  | 504 | 273 |  | 75 | 24 |
|  |  |  | Hyaluronic acid injection |  |  | 5 PCL reconstruction |  |  |
|  |  |  |  | 35771 | 2794 |  | 13362 | n<5 |
|  |  |  |  | 43 | 137 |  | 15 | n<5 |
|  |  |  | Corticosteroid injection |  |  | 6 Collateral ligaments reconstruction |  |  |
|  |  |  |  | 37447 | 1079 |  | 13339 | n<5 |
|  |  |  |  | 56 | 163 |  | 38 | n<5 |
|  |  |  | Tricyclic antidepressants |  |  | 7 Debridement |  |  |
|  |  |  |  | 38474 | 121 |  | 12577 | 358 |
|  |  |  |  | 91 | 59 |  | 336 | 108 |
|  |  |  | Anticonvulsants |  |  | 8 Microfracture |  |  |
|  |  |  |  | 37516 | 1217 |  | 13322 | 14 |
|  |  |  |  | 6 | 6 |  | 40 | n<5 |
|  |  |  | Methotrexate |  |  | 9 Surgery for jumper's knee |  |  |
|  |  |  |  |  |  |  | 13371 | 8 |
|  |  |  |  |  |  |  |  |  |
|  |  |  | Bisphosphonates |  |  | 10 Partial synovectomy |  |  |
|  |  |  |  |  |  |  | 12990 | 307 |
|  |  |  |  |  |  |  | 51 | 31 |
|  |  |  |  |  |  | 11 Patellae Stabilization |  |  |
|  |  |  |  |  |  |  | 13347 |  |
|  |  |  |  |  |  |  | 32 |  |
|  |  |  |  |  |  | 12 Osteotomy |  |  |
|  |  |  |  |  |  |  | 13353 | 10 |
|  |  |  |  |  |  |  | 8 | 8 |
|  |  |  |  |  |  | 13 Arthroplasty |  |  |
|  |  |  |  |  |  |  | 12988 | 28 |
|  |  |  |  |  |  |  | 33 | 330 |
|  |  |  |  |  |  | 14 Patellae, other |  |  |
|  |  |  |  |  |  |  | 13331 | n<5 |
|  |  |  |  |  |  |  | 42 | n<5 |
|  |  |  |  |  |  | 15 Other knee surgeries |  |  |
|  |  |  |  |  |  |  | 12820 | 358 |
|  |  |  |  |  |  |  | 172 | 29 |

| **Surgery (Left side)** |  |  | **Surgery (Ignoring side)** |  |  | **Surgrey (less detail)** |  |  |
| --- | --- | --- | --- | --- | --- | --- | --- | --- |
|  | Registry |  |  | Registry |  |  | Registry |  |
| GLAD | No | Yes | GLAD | No | Yes | Glad | No | Yes |
| 1 Diagnostic arthroscopy |  |  | 1 Diagnostic arthroscopy |  |  | Arthroscopic hip surgery |  |  |
|  | 13373 |  |  | 13365 |  |  | 38700 | 11 |
|  | 6 |  |  | 14 |  |  | 11 | 23 |
| 2 Arthroscopic surgery for femoroacetabular impingement syndrome |  |  | 2 Arthroscopic surgery for femoroacetabular impingement syndrome |  |  | OA hip surgery |  |  |
|  | 13370 | 5 |  | 13348 | 20 |  | 37972 | 61 |
|  | n<5 | n<5 |  | n<5 | 8 |  | 25 | 687 |
| 3 Removal of loose bodies in hip joint |  |  | 3 Removal of loose bodies in hip joint |  |  | Hip fracture surgery |  |  |
|  | 13376 | n<5 |  | 13373 | n<5 |  | 38639 | 34 |
|  | n<5 | 0 |  | n<5 | 0 |  | 33 | 39 |
| 4 Surgical treatment of hip dysplasia |  |  | 4 Surgical treatment of hip dysplasia |  |  | Other hip surgeries |  |  |
|  | 13364 | n<5 |  | 13359 | n<5 |  | 38595 | 74 |
|  | 14 | 0 |  | 17 | n<5 |  | 62 | 14 |
| 6 Tenotomy |  |  | 6 Tenotomy |  |  | Arthroscopic hip surgery |  |  |
|  | 13372 | 5 |  | 13364 | 13 |  | 38700 | 11 |
|  | n<5 | n<5 |  | n<5 | n<5 |  | 11 | 23 |
| 7 Labral repair or ligament reconstruction |  |  | 7 Labral repair or ligament reconstruction |  |  | Arthroplasty |  |  |
|  | 13375 | 0 |  | 13362 | 5 |  | 37976 | 59 |
|  | n<5 | n<5 |  | 7 | 5 |  | 24 | 686 |
| 8 Partial synovectomy |  |  | 8 Partial synovectomy |  |  | Other hip surgeries |  |  |
|  | 13371 | 6 |  | 13358 | 19 |  | 38491 | 104 |
|  | n<5 | 0 |  | n<5 | 0 |  | 91 | 59 |
| 10 Microfracture |  |  | 10 Microfracture |  |  | Arthroscopic knee surgery |  |  |
|  | 13377 |  |  | 13373 | n<5 |  | 35224 | 502 |
|  | n<5 |  |  | n<5 | 0 |  | 1035 | 1984 |
| 11 Arthroplasty |  |  | 11 Arthroplasty |  |  | ACL reconstruction |  |  |
|  | 12943 | 46 |  | 12610 | 59 |  | 38502 | 27 |
|  | 28 | 362 |  | 24 | 686 |  | 112 | 104 |
| 12 Hip resurfacing |  |  | 12 Hip resurfacing |  |  | PCL reconstruction |  |  |
|  | 13377 | n<5 |  | 13372 | 5 |  | 38720 | n<5 |
|  | n<5 | 0 |  | n<5 | 0 |  | 20 | n<5 |
| 13 Osteosynthesis of proximal femoral fracture |  |  | 13 Osteosynthesis of proximal femoral fracture |  |  | Collateral ligaments reconstruction |  |  |
|  | 13328 | 10 |  | 13273 | 34 |  | 38674 | 5 |
|  | 22 | 19 |  | 33 | 39 |  | 64 | n<5 |
| 14 Other hip surgeries |  |  | 14 Other hip surgeries |  |  | Patellae-realted surgery |  |  |
|  | 13320 | 31 |  | 13250 | 71 |  | 38573 | 27 |
|  | 24 | n<5 |  | 50 | 8 |  | 126 | 19 |
| 1 Diagnostic arthroscopy |  |  | 1 Diagnostic arthroscopy |  |  | OA surgery |  |  |
|  | 12570 | 240 |  | 11693 | 627 |  | 38044 | 53 |
|  | 494 | 75 |  | 803 | 256 |  | 35 | 613 |
| 2 Arthroscopic meniscal surgery |  |  | 2 Arthroscopic meniscal surgery |  |  | Other |  |  |
|  | 12074 | 299 |  | 10904 | 703 |  | 37407 | 947 |
|  | 596 | 410 |  | 720 | 1052 |  | 299 | 92 |
| 3 Removal of loose bodies in knee joint |  |  | 3 Removal of loose bodies in knee joint |  |  | Arthroscopic knee surgery |  |  |
|  | 13181 | 21 |  | 13019 | 46 |  | 35180 | 471 |
|  | 166 | 11 |  | 280 | 34 |  | 1060 | 2034 |
| 4 ACL reconstruction |  |  | 4 ACL reconstruction |  |  | Arthroplasty |  |  |
|  | 13241 | 10 |  | 13136 | 27 |  | 38093 | 37 |
|  | 88 | 40 |  | 112 | 104 |  | 29 | 586 |
| 5 PCL reconstruction |  |  | 5 PCL reconstruction |  |  | Other knee surgeries |  |  |
|  | 13371 |  |  | 13354 | n<5 |  | 37250 | 884 |
|  | 8 |  |  | 20 | n<5 |  | 425 | 186 |
| 6 Collateral ligaments reconstruction |  |  | 6 Collateral ligaments reconstruction |  |  |  |  |  |
|  | 13349 | n<5 |  | 13308 | 5 |  |  |  |
|  | 28 | 0 |  | 64 | n<5 |  |  |  |
| 7 Debridement |  |  | 7 Debridement |  |  |  |  |  |
|  | 12580 | 360 |  | 11717 | 894 |  |  |  |
|  | 308 | 131 |  | 416 | 352 |  |  |  |
| 8 Microfracture |  |  | 8 Microfracture |  |  |  |  |  |
|  | 13315 | 10 |  | 13253 | 36 |  |  |  |
|  | 47 | 7 |  | 75 | 15 |  |  |  |
| 9 Surgery for jumper's knee |  |  | 9 Surgery for jumper's knee |  |  |  |  |  |
|  | 13368 | 8 |  | 13352 | 24 |  |  |  |
|  | n<5 | 0 |  | n<5 | n<5 |  |  |  |
| 10 Partial synovectomy |  |  | 10 Partial synovectomy |  |  |  |  |  |
|  | 12977 | 325 |  | 12365 | 867 |  |  |  |
|  | 48 | 29 |  | 70 | 77 |  |  |  |
| 11 Patellae Stabilization |  |  | 11 Patellae Stabilization |  |  |  |  |  |
|  | 13332 |  |  | 13314 |  |  |  |  |
|  | 47 |  |  | 65 |  |  |  |  |
| 12 Osteotomy |  |  | 12 Osteotomy |  |  |  |  |  |
|  | 13346 | 10 |  | 13320 | 26 |  |  |  |
|  | 12 | 11 |  | 11 | 22 |  |  |  |
| 13 Arthroplasty |  |  | 13 Arthroplasty |  |  |  |  |  |
|  | 13018 | 22 |  | 12727 | 37 |  |  |  |
|  | 39 | 300 |  | 29 | 586 |  |  |  |
| 14 Patellae, other |  |  | 14 Patellae, other |  |  |  |  |  |
|  | 13334 | 6 |  | 13287 | 12 |  |  |  |
|  | 35 | n<5 |  | 71 | 9 |  |  |  |
| 15 Other knee surgeries |  |  | 15 Other knee surgeries |  |  |  |  |  |
|  | 12806 | 353 |  | 12041 | 947 |  |  |  |
|  | 183 | 37 |  | 299 | 92 |  |  |  |
